# Supplementary material
Source: Springer Nature journal article supplement (https://www.springermedizin.de/resource/supplementary/13014_2011_451_MOESM8_ESM.pdf/9633466)

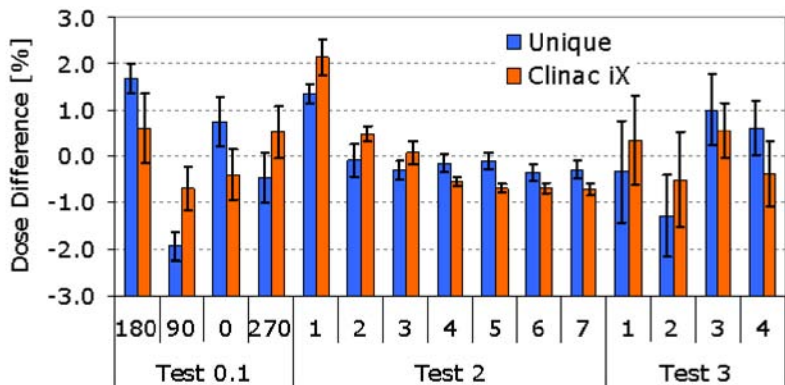

### Test 0.1: DMLC Dosimetry

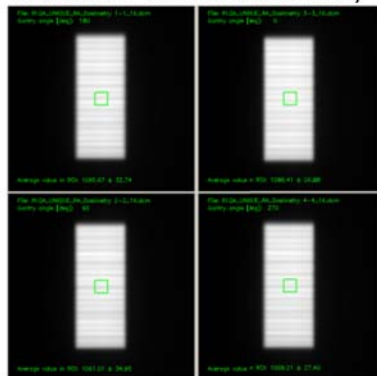

Test 2: Accurate control of dose rate and gantry speed during RapidArc delivery

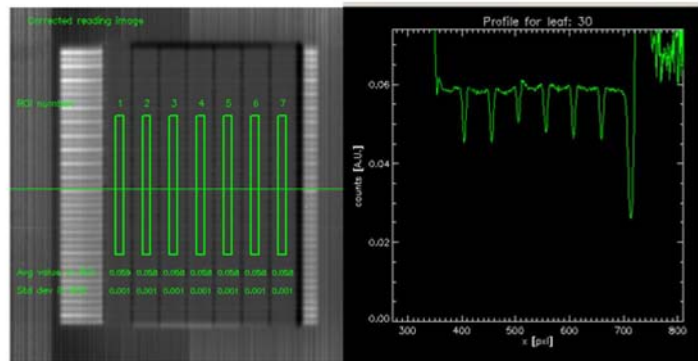

Test 3: accurate control of leaf speed during RapidArc delivery

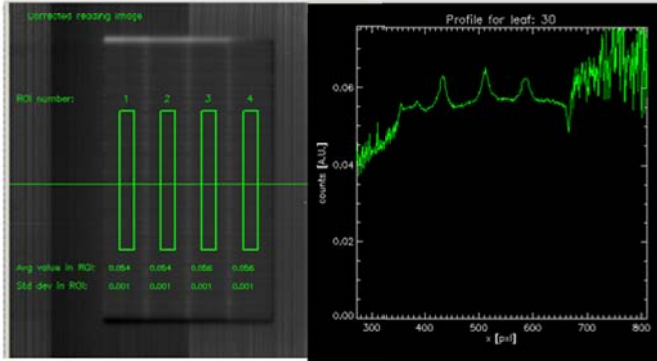

Supplement: MOESM8 [file 9633466]
